# Supplementary material for: Palladium-catalyzed Sonogashira coupling reactions in γ-valerolactone-based ionic liquids
Source: publisher site journal article supplement (doi:10.3762/bjoc.15.284), 2019-12-03
Supplement: Additional file 1 [file 1860-5397-15-284-S1.pdf]

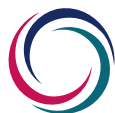

## Supporting Information

for

### **Palladium-catalyzed Sonogashira coupling reactions in $\gamma$ -valerolactone-based ionic liquids**

László Orha, József M. Tukacs, László Kollár and László T. Mika

*Beilstein J. Org. Chem.* **2019**, *15*, 2907–2913. [doi:10.3762/bjoc.15.284](https://doi.org/10.3762/bjoc.15.284)

**Source of chemicals, the detailed experimental procedure as well as characterization data of isolated compounds**

## Source of chemicals

$\gamma$ -Valerolactone, phenylacetylene, propargyl alcohol, 1-ethynyl-1-cyclohexanol, 3-ethyl-1-pentyn-3-ol, iodobenzene and its substituted derivatives, copper iodide, 1-butyl-3-methylimidazolium tetrafluoroborate, 1-butyl-3-methylimidazolium hexafluorophosphate, 1-butyl-3-methylimidazolium octylsulfate, 1-ethyl-3-methylimidazolium tetrafluoroborate, triethylamine, and palladium-catalyst precursors were purchased from Sigma-Aldrich Kft., Budapest, Hungary and used as received. Solvents were obtained from Molar Chemicals Ltd., Budapest, Hungary and used without further purification.

### Preparation of tetrabutylphosphonium 4-ethoxyvalerate ([TBP][4EtOV])

A mixture of 8.71 g (50 mmol) of ethyl 4-ethoxyvalerate and a 40% aqueous solution of 13.82 g (50 mmol) of tetrabutylphosphonium hydroxide was stirred in 10 ml water at 60 °C for 1 h, during which time the two-phase system turned into a homogeneous solution. The water formed was removed under reduced pressure, then 5 × 5 ml hexane was distilled from the oily residue under reduced pressure, then was dried at 80 °C in vacuum (0.5 mmHg). Yield: 20,01 g (99%) as a light-yellow solid. <sup>1</sup>H-NMR, <sup>13</sup>C-NMR and <sup>31</sup>P-NMR correspond to our published results.<sup>1</sup>

### Preparation and characterization of acetylenes presented in Table 3

#### Diphenylacetylene (3a)

The general procedure was followed using 56  $\mu$ l (0.5 mmol) iodobenzene, 82  $\mu$ l (0.75 mmol) phenylacetylene, 1.8 mg (0.025 mmol) (PPh<sub>3</sub>)<sub>2</sub>PdCl<sub>2</sub>, and 0.8 ml of [TBP][4EtOV] ionic liquid as solvent. Yield: 75.7 mg (85%) as white solid. <sup>1</sup>H NMR (250 MHz, CDCl<sub>3</sub>):  $\delta$  (ppm) 7.21–7.33 (m, 6H); 7.38–7.52 (m, 4H). It corresponds to the published results.<sup>2</sup>

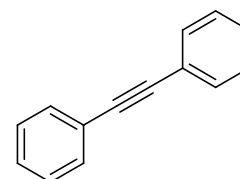

#### 1-Methyl-2-phenylethynylbenzene (3b)

The general procedure was followed using 64  $\mu$ l (0.5 mmol) 2-iodotoluene, 82  $\mu$ l (0.75 mmol) phenylacetylene, 1.8 mg (0.025 mmol) (PPh<sub>3</sub>)<sub>2</sub>PdCl<sub>2</sub>, and 0.8 ml of [TBP][4EtOV] ionic liquid as solvent. Yield: 92.9 mg (96%) as colorless oil. <sup>1</sup>H NMR (250 MHz, CDCl<sub>3</sub>):  $\delta$  (ppm) 2.55 (s, 3H), 7.14–7.23 (m, 1H), 7.23–7.29 (d, 2H), 7.33–7.41 (m, 3H), 7.50–7.61 (m, 3H). It corresponds to the published results.<sup>3</sup>

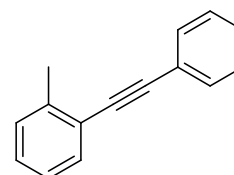

### 1-Methyl-4-phenylethynylbenzene (3c)

The general procedure was followed using 109.0 mg (0.5 mmol) 4-iodotoluene, 82  $\mu$ l (0.75 mmol) phenylacetylene, 1.8 mg (0.025 mmol)  $(\text{PPh}_3)_2\text{PdCl}_2$ , and 0.8 ml of [TBP][4EtOV] ionic liquid as solvent. Yield: 91.4 mg (95%) as white solid.  $^1\text{H NMR}$  (250 MHz,  $\text{CDCl}_3$ ):  $\delta$  (ppm) 2.38 (s, 3H), 7.17 (d, 2H), 7.30–7.38 (m, 3H), 7.44 (d, 2H), 7.49–7.57 (m, 2H). It corresponds to the published results.<sup>4</sup>

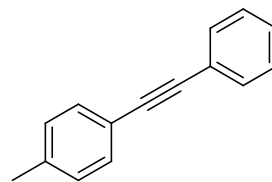

### 1-Methoxy-4-phenylethynylbenzene (3d)

The general procedure was followed using 117.0 mg (0.5 mmol) 4-iodoanisole, 82  $\mu$ l (0.75 mmol) phenylacetylene, 1.8 mg (0.025 mmol)  $(\text{PPh}_3)_2\text{PdCl}_2$ , and 0.8 ml of [TBP][4EtOV] ionic liquid as solvent. Yield: 85.4 mg (82%) as white solid.  $^1\text{H NMR}$  (250 MHz,  $\text{CDCl}_3$ ):  $\delta$  (ppm) 3.66 (s, 1H), 6.74 (d, 2H), 7.15–7.24 (m, 3H), 7.36 (d, 2H), 7.38–7.44 (m, 2H). It corresponds to the published results.<sup>5</sup>

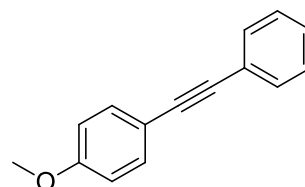

### 1-Fluoro-4-phenylethynylbenzene (3e)

The general procedure was followed using 58  $\mu$ l (0.5 mmol) 1-iodo-4-fluorobenzene, 82  $\mu$ l (0.75 mmol) phenylacetylene, 1.8 mg (0.025 mmol)  $(\text{PPh}_3)_2\text{PdCl}_2$ , and 0.8 ml of [TBP][4EtOV] ionic liquid as solvent. Yield: 78.0 mg (80%) as colorless oil.  $^1\text{H NMR}$  (250 MHz,  $\text{CDCl}_3$ ):  $\delta$  (ppm) 7.05 (t, 2H), 7.31–7.39 (m, 3H), 7.46, 7.59 (m, 4H). It corresponds to the published results.<sup>6</sup>

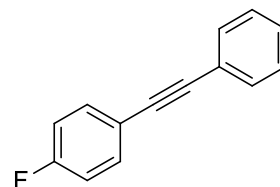

### 1-Chloro-4-phenylethynylbenzene (3f)

The general procedure was followed using 119.2 mg (0.5 mmol) 1-chloro-4-iodobenzene, 82  $\mu$ l (0.75 mmol) phenylacetylene, 1.8 mg (0.025 mmol)  $(\text{PPh}_3)_2\text{PdCl}_2$ , and 0.8 ml of [TBP][4EtOV] ionic liquid as solvent. Yield: 92.1 mg (87%) as colorless oil.  $^1\text{H NMR}$  (250 MHz,  $\text{CDCl}_3$ ):  $\delta$  (ppm) 7.39–7.49 (m, 5H), 7.47 (d, 2H), 7.50–7.57 (m, 2H). It corresponds to the published results.<sup>16</sup>

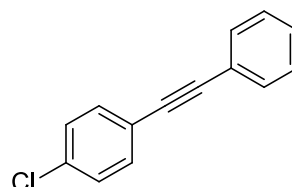

### 1-Bromo-4-phenylethynylbenzene (3g)

The general procedure was followed using 141.5 mg (0.5 mmol) 1-bromo-4-iodobenzene, 82  $\mu$ l (0.75 mmol) phenylacetylene, 1.8 mg (0.025 mmol)  $(\text{PPh}_3)_2\text{PdCl}_2$ , and 0.8 ml of [TBP][4EtOV] ionic liquid as solvent. Yield: 66.8 mg (52%) as pale-yellow solid.  $^1\text{H NMR}$  (250 MHz,  $\text{CDCl}_3$ ):  $\delta$  (ppm) 7.30–7.39 (m, 3H), 7.39 (d, 2H), 7.49 (d, 2H), 7.51–7.58 (m, 2H). It corresponds to the published results.<sup>7</sup>

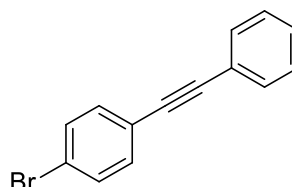

### 2-(2-Phenylethynyl)thiophene (3h)

The general procedure was followed using 55  $\mu\text{l}$  (0.5 mmol) 2-iodothiophene, 82  $\mu\text{l}$  (0.75 mmol) phenylacetylene, 1.8 mg (0.025 mmol)  $(\text{PPh}_3)_2\text{PdCl}_2$ , and 0.8 ml of [TBP][4EtOV] ionic liquid as solvent. Yield: 74.2 mg (80%) as colorless oil.  $^1\text{H}$

NMR (250 MHz,  $\text{CDCl}_3$ ):  $\delta$  (ppm) 7.03 (m, 1H), 7.28–7.33 (m, 2H), 7.35–7.39 (m, 3H), 7.50–7.59 (m, 2H). It corresponds to the published results.<sup>8</sup>

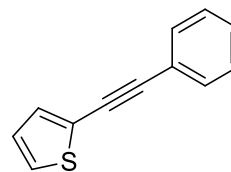

### 3-(2-Phenylethynyl)pyridine (3i)

The general procedure was followed using 102.5 mg (0.5 mmol) 3-iodopyridine, 82  $\mu\text{l}$  (0.75 mmol) phenylacetylene, 1.8 mg (0.025 mmol)  $(\text{PPh}_3)_2\text{PdCl}_2$ , and 0.8 ml of [TBP][4EtOV] ionic liquid as solvent. Yield: 67.3 mg (75%) as colorless oil.  $^1\text{H}$

NMR (250 MHz,  $\text{CDCl}_3$ ):  $\delta$  (ppm) 7.22–7.31 (m, 1H), 7.31–7.41 (m, 3H), 7.48–7.61 (m, 2H), 7.80 (td, 1H), 8.54 (d, 1H), 8.77 (s, 1H). It corresponds to the published results.<sup>9</sup>

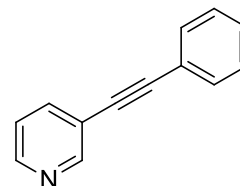

### 2-Amino-3-(2-phenylethynyl)pyridine (3j)

The general procedure was followed using 110.0 mg (0.5 mmol) 2-amino-3-iodopyridine, 82  $\mu\text{l}$  (0.75 mmol) phenylacetylene, 1.8 mg (0.025 mmol)  $(\text{PPh}_3)_2\text{PdCl}_2$ , and 0.8 ml of [TBP][4EtOV] ionic liquid as solvent. Yield: 90.5 mg

(93%) as light-yellow solid.  $^1\text{H}$  NMR (250 MHz,  $\text{CDCl}_3$ ):  $\delta$  (ppm) 6.55–6.73 (m, 1H), 7.20–7.45 (m, 3H), 7.46–7.76 (m, 3H), 7.99–8.15 (m, 1H), 5.21 (br.s, 2H). It corresponds to the published results.<sup>10</sup>

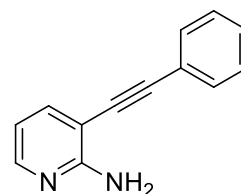

### 2-Chloro-1-(2-phenylethynyl)-4-trifluoromethylbenzene (3k)

The general procedure was followed using 77  $\mu\text{l}$  (0.5 mmol) 3-chloro-4-iodobenzotrifluoride, 82  $\mu\text{l}$  (0.75 mmol) phenylacetylene, 1.8 mg (0.025 mmol)  $(\text{PPh}_3)_2\text{PdCl}_2$ , and 0.8 ml of [TBP][4EtOV] ionic liquid as solvent. Yield: 110.6

mg (79%) as colorless oil.  $^1\text{H}$  NMR (250 MHz,  $\text{CDCl}_3$ ):  $\delta$  (ppm) 7.29–7.42 (m, 3H), 7.43–7.51 (m, 1H), 7.51–7.61 (m, 2H), 7.61–7.72 (m, 2H).  $^{13}\text{C}$  NMR (62.8 MHz,  $\text{CDCl}_3$ ):  $\delta$  (ppm) 85.4, 97.5, 122.7, 123.5 (q,  $J = 272$  Hz,  $\text{CF}_3$ ), 123.7 (q,  $J = 3.6$  Hz), 126.7 (q,  $J = 3.8$  Hz), 127.4, 128.9, 129.6, 131.4 (q,  $J = 33$  Hz), 132.3, 133.8, 136.9. HRMS: Calculated: 281.0339, Measured: 281.03377 (-0.60 ppm)

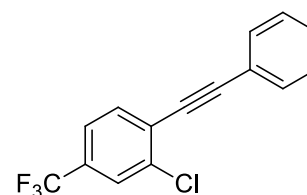

### 2-Chloro-5-(2-phenylethynyl)pyridine (3l)

The general procedure was followed using 119.7 mg (0.5 mmol) 2-chloro-5-iodopyridine, 55  $\mu\text{l}$  (0.5 mmol) phenylacetylene, 1.8 mg (0.025 mmol)  $(\text{PPh}_3)_2\text{PdCl}_2$ , and 0.8 ml of [TBP][4EtOV] ionic liquid as solvent. Yield: 76.9

mg (72%) as light-yellow solid.  $^1\text{H}$  NMR (250 MHz,  $\text{CDCl}_3$ ):  $\delta$  (ppm) 7.21 (d,

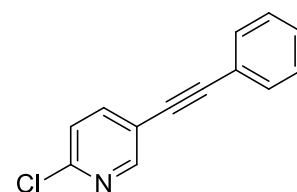

1H), 7.24–7.34 (m, 3H), 7.38–7.49 (m, 2H), 7.65 (d, 1H), 8.44 (s, 1H). <sup>13</sup>C NMR (62.8 MHz, CDCl<sub>3</sub>), δ (ppm) 85.1, 94.2, 119.8, 122.5, 124.2, 128.9, 129.4, 132.1, 141.2, 150.8, 152.4. HRMS: Calculated: 214.0418, Measured: 214.04164 (–0.76 ppm)

### 2,5-Bis(2-phenylethynyl)pyridine (3m)

The general procedure was followed using 119.7 mg (0.5 mmol) 2-chloro-5-iodopyridine, 137 μl (1.25 mmol, 2.5 equiv) phenylacetylene, 1.8 mg (0.025 mmol) (PPh<sub>3</sub>)<sub>2</sub>PdCl<sub>2</sub>, and 0.8 ml of [TBP][4EtOV] ionic liquid as solvent. Yield: 96.3 mg (69%) as light-yellow solid. <sup>1</sup>H NMR (250 MHz, CDCl<sub>3</sub>): δ (ppm) 7.22–7.34 (m, 6H), 7.41 (d, 1H), 7.44–7.55 (m, 4H), 7.69 (d, 1H), 8.67 (s, 1H). It corresponds to the published results.<sup>11</sup>

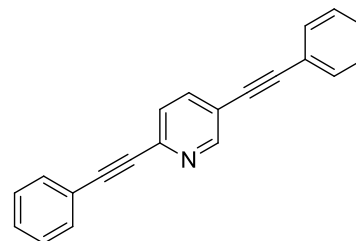

## Preparation and characterization of acetylenes presented in Table 4

### 3-Phenylprop-2-yn-1-ol (5a)

The general procedure was followed using 56 μl (0.5 mmol) iodobenzene, 44 μl (0.75 mmol) propargyl alcohol, 1.8 mg (0.025 mmol) (PPh<sub>3</sub>)<sub>2</sub>PdCl<sub>2</sub>, and 0.8 ml of [TBP][4EtOV] ionic liquid as solvent. Yield: 53.4 mg (80%) as light-yellow oil. <sup>1</sup>H NMR (250 MHz, CDCl<sub>3</sub>): δ (ppm) 4.49 (s, 2H), 7.33–7.25 (m, 3H), 7.47–7.38 (m, 2H). It corresponds to the published results.<sup>12</sup>

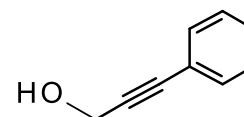

### 3-(4-Nitrophenyl)prop-2-yn-1-ol (5b)

The general procedure was followed using 124.5 mg (0.5 mmol) 1-iodo-4-nitrobenzene, 44 μl (0.75 mmol) propargyl alcohol, 1.8 mg (0.025 mmol) (PPh<sub>3</sub>)<sub>2</sub>PdCl<sub>2</sub>, and 0.8 ml of [TBP][4EtOV] ionic liquid as solvent. Yield: 86.6 mg (78%) as light-yellow solid. <sup>1</sup>H NMR (250 MHz, CDCl<sub>3</sub>): δ (ppm) 4.53 (s, 2H), 7.56 (d, 2H), 8.18 (d, 2H). It corresponds to the published results.<sup>13</sup>

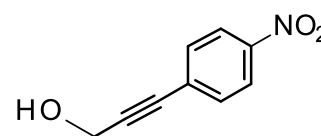

### 3-(4-Methoxyphenyl)prop-2-yn-1-ol (5c)

The general procedure was followed using 117.0 mg (0.5 mmol) 4-iodoanisole, 44 μl (0.75 mmol) propargyl alcohol, 1.8 mg (0.025 mmol) (PPh<sub>3</sub>)<sub>2</sub>PdCl<sub>2</sub>, and 0.8 ml of [TBP][4EtOV] ionic liquid as solvent. Yield: 69.2 mg (85%) as light-yellow oil. <sup>1</sup>H NMR (250 MHz, CDCl<sub>3</sub>): δ (ppm) 3.79 (s, 3H), 4.46 (s, 2H), 6.82 (d, 2H), 7.35 (d, 2H). It corresponds to the published results.<sup>14</sup>

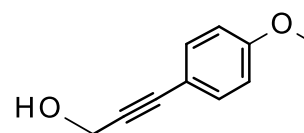

## Preparation and characterization of acetylenes presented in Table 5

### 1-[2-(Phenylethynyl)cyclohexanol (7a)

The general procedure was followed using 56  $\mu\text{l}$  (0.5 mmol) iodobenzene, 93.1 mg (0.75 mmol) 1-ethynyl-1-cyclohexanol, 1.8 mg (0.025 mmol)  $(\text{PPh}_3)_2\text{PdCl}_2$ , and 0.8 ml of [TBP][4EtOV] ionic liquid as solvent. Yield: 85.7 mg (85%) as light-yellow solid.  $^1\text{H NMR}$  (250 MHz,  $\text{CDCl}_3$ ):  $\delta$  (ppm) 1.17–1.34 (m, 1H), 1.49–1.84 (m, 8H), 1.88–2.08 (m, 2H), 2.16 (s, 1H), 7.21–7.36 (m, 3H), 7.38–7.48 (m, 2H). It corresponds to the published results.<sup>15</sup>

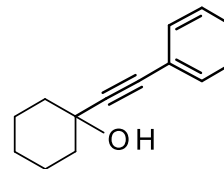

### 1-[2-(4-Nitrophenyl)ethynyl]cyclohexanol (7b)

The general procedure was followed using 124.5 mg (0.5 mmol) 1-iodo-4-nitrobenzene, 93.1 mg (0.75 mmol) 1-ethynyl-1-cyclohexanol, 1.8 mg (0.025 mmol)  $(\text{PPh}_3)_2\text{PdCl}_2$ , and 0.8 ml of [TBP][4EtOV] ionic liquid as solvent.

Yield: 122 mg (99%) as light-yellow solid.  $^1\text{H NMR}$  (250 MHz,  $\text{CDCl}_3$ ):  $\delta$  (ppm) 1.22–1.41 (m, 1H), 1.45–1.86 (m, 8H), 1.94–2.10 (m, 2H), 7.55 (d, 2H), 8.17 (d, 2H). It corresponds to the published results.<sup>16</sup>

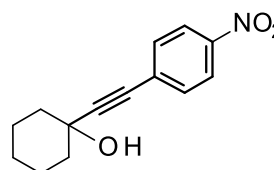

### 1-[2-(4-Methoxyphenyl)ethynyl]cyclohexanol (7c)

The general procedure was followed using 56  $\mu\text{l}$  (0.5 mmol) iodobenzene, 93.1 mg (0.75 mmol) 1-ethynyl-1-cyclohexanol, 1.8 mg (0.025 mmol)  $(\text{PPh}_3)_2\text{PdCl}_2$ , and 0.8 ml of [TBP][4EtOV] ionic liquid as solvent. Yield: 115 mg (99%) as light-yellow solid.  $^1\text{H NMR}$  (250 MHz,  $\text{CDCl}_3$ ):  $\delta$  (ppm) 1.18–1.34 (m, 1H),

1.48–1.81 (m, 8H), 1.85–2.12 (m, 3H), 3.81 (s, 3H), 6.82, (d, 2H), 7.36 (d, 2H). It corresponds to the published results.<sup>17</sup>

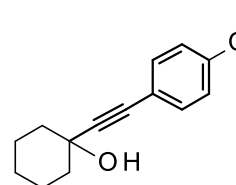

## Preparation and characterization of acetylenes presented in Table 6

### 3-Ethyl-1-phenyl-pent-1-yn-3-ol (9a)

The general procedure was followed using 56  $\mu\text{l}$  (0.5 mmol) iodobenzene, 96  $\mu\text{l}$  (0.75 mmol) 3-ethyl-1-pentyn-3-ol, 1.8 mg (0.025 mmol)  $(\text{PPh}_3)_2\text{PdCl}_2$ , and 0.8 ml of [TBP][4EtOV] ionic liquid as solvent. Yield: 76.9 mg (87%) as light-yellow oil.

$^1\text{H NMR}$  (250 MHz,  $\text{CDCl}_3$ ):  $\delta$  (ppm) 1.10 (t, 6H), 1.69–1.82 (m, 4H), 2.03 (s, 1H), 7.27–7.33 (m, 3H), 7.37–7.45 (m, 2H). It corresponds to the published results.<sup>18</sup>

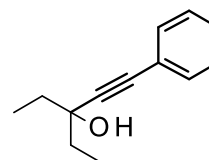

### 3-Ethyl-1-(4-nitrophenyl)-pent-1-yn-3-ol (9b)

The general procedure was followed using 124.5 mg (0.5 mmol) 1-iodo-4-nitrobenzene, 96  $\mu$ l (0.75 mmol) 3-ethyl-1-pentyn-3-ol, 1.8 mg (0.025 mmol)  $(\text{PPh}_3)_2\text{PdCl}_2$ , and 0.8 ml of [TBP][4EtOV] ionic liquid as solvent. Yield: 99.1

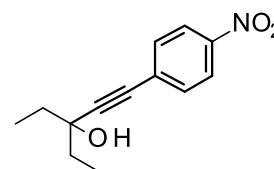

mg (85%) as light yellow oil.  $^1\text{H}$  NMR (250 MHz,  $\text{CDCl}_3$ ):  $\delta$  (ppm) 1.10 (t, 6H), 1.72–1.86 (m, 4H), 2.04 (s, 1H), 7.56 (d, 2H), 8.17 (d, 2H). It corresponds to the published results.<sup>19</sup>

### 3-Ethyl-1-(4-methoxyphenyl)-pent-1-yn-3-ol (9c)

The general procedure was followed using 117.0 mg (0.5 mmol) 4-iodoanisole, 96  $\mu$ l (0.75 mmol) 3-ethyl-1-pentyn-3-ol, 1.8 mg (0.025 mmol)  $(\text{PPh}_3)_2\text{PdCl}_2$ , and 0.8 ml of [TBP][4EtOV] ionic liquid as solvent. Yield: 88.7 mg (81%) as light-yellow oil.  $^1\text{H}$  NMR (250 MHz,  $\text{CDCl}_3$ ):  $\delta$  (ppm) 1.09 (t, 6H), 1.69–1.81

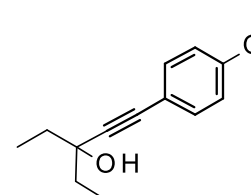

(m, 4H), 1.99 (s, 1H), 3.80 (s, 3H), 6.83 (d, 2H), 7.35 (d, 2H).  $^{13}\text{C}$  NMR (62.9 MHz,  $\text{CDCl}_3$ ):  $\delta$  (ppm) 9.0, 34.8, 55.6, 72.8, 84.8, 90.6, 114.6, 115.4, 133.5, 159.8. HRMS Calculated: 219.1380, Measured: 219.13761 (–1.58 ppm)

## References

- 1 L. Orha, J. M. Tukacs, B. Gyarmati, A. Szilágyi, L. Kollár, L. T. Mika, *ACS Sustainable Chem. Eng.* **2018**, 6, 5097.
- 2 Wardrop, Duncan J.; Komenda, John P. *Org. Lett.* **2012**, 14, 1548.
- 3 Shi, Leilei; Jia, Wei; Li, Xun; Jiao, Ning *Tetrahedron Lett.* **2013**, 54, 1951.
- 4 Buxaderas, Eduardo; Alonso, Diego A.; Najera, Carmen *Eur. J. Org. Chem.* **2013**, 26, 5864.
- 5 Wardrop, Duncan J.; Komenda, John P. *Org. Lett.*, **2012**, 14, 1548.
- 6 Li, Tingyi; Sun, Peng; Yang, Hailong; Zhu, Yan; Yan, Hong; Lu, Linhua; Mao, Jincheng *Tetrahedron* **2012**, 68, 6413.
- 7 Xu, Cheng-Fu; Xu, Mei; Jia, Yi-Xia; Li, Chuan-Ying *Org. Lett.* **2011**, 13, 1556.
- 8 Garcia Ruano, Jose Luis; Aleman, Jose; Marzo, Leyre; Alvarado, Cuauhtemoc; Tortosa, Mariola; Diaz-Tendero, Sergio; Fraile, Alberto *Chem. Eur. J.* **2012**, 18, 8414.
- 9 Li, Xi'Ang; Yang, Fan; Wu, Yangjie *J. Org. Chem.* **2013**, 78, 4543.
- 10 De Mattos, Marcos Carlos; Alatorre-Santamaria, Sergio; Gotor-Fernandez, Vicente; Gotor, Vicente *Synthesis* **2007**, 2149.
- 11 Kang, Dongjin; Eom, Dahan; Kim, Hyunseok; Lee, Phil Ho *Eur. J. Org. Chem.* **2010**, 2330.
- 12 Wang, Lin; Sun, Hongjian; Li, Xiaoyan *Eur. J. Inorg. Chem.* **2015**, 2732.
- 13 Nowak-Krol, Agnieszka; Koszarna, Beata; Yoo, Su Yeon; Chrominski, Jan; Weclawski, Marek K.; Lee, Chang-Hee; Gryko, Daniel T. *J. Org. Chem.* **2011**, 76, 2627.

- 
- 14 Dell'Isola, Antonio; McLachlan, Matthew M. W.; Neuman, Benjamin W.; Al-Mullah, Hawaa M. N.; Binks, Alexander W. D.; Elvidge, Warren; Shankland, Kenneth; Cobb, Alexander J. A. *Chem. Eur. J.* **2014**, *20*, 11685.
- 15 Belov, Dmitry S.; Lukyanenko, Evgeny R.; Kurkin, Alexander V.; Yurovskaya, Marina A. J. *Org. Chem.*, **2012**, *77*, 10125.
- 16 Gholap, Atul R.; Venkatesan; Pasricha, Renu; Daniel, Thomas; Lahoti, Rajgopal J.; Srinivasan, Kumar V. *J. Org. Chem.* **2005**, *70*, 4869.
- 17 Hussain, Mohd. Kamil; Ansari, Mohd. Imran; Kant, Ruchir; Hajela, Kanchan *Org. Lett.*, **2014**, *16*, 560.
- 18 Ying, Jun; Zhou, Chao; Wu, Xiao-Feng *Org. Biomol. Chem.* **2018**, *16*, 1065.
- 19 Olaizola, Iurre; Campano, Teresa E.; Iriarte, Igor; Vera, Silvia; Mielgo, Antonia; García, Jesús M.; Odriozola, José M.; Oiarbide, Mikel; Palomo, Claudio *Chem. Eur. J.*, **2018**, *24*, 3893.
